# Supplementary material for: Ulmus parvifolia Accelerates Skin Wound Healing by Regulating the Expression of MMPs and TGF-β
Source: MDPI journal article supplement (doi:10.3390/jcm9010059), 2019-12-26
Supplement: s1 [file s1]

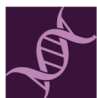

Supplementary:

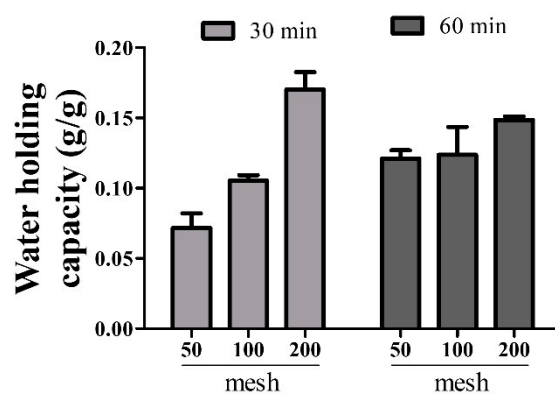

**Figure S1.** Effect of particle size and soaking time on the water holding capacity of different sized UP particles. This parameter was determined using the method of Zhao (2009)
